# Supplementary material
Source: PubMed Central journal article supplement (PMC6556570)
Supplement: supp_RA119.008209_144008_1_supp_315974_pq2k5t.pdf [file supp_RA119.008209_144008_1_supp_315974_pq2k5t.pdf]

## **Interplay of cold shock protein E with an uncharacterized protein, YciF, lowers porin expression and enhances bile resistance in *Salmonella* Typhimurium**

**Semanti Ray<sup>1</sup>, Rochelle Da Costa<sup>1</sup>, Mrinmoy Das<sup>1</sup> and Dipankar Nandi<sup>1,2,\*</sup>**

### **Supplementary Methods**

**Semi-quantitative reverse transcription (RT)-PCR.** RNA was isolated from the WT and  $\Delta cspE$  strains grown in the presence or absence of 3% Bile Salts at 3 and 8 hour time points and RNA was extracted using the TRIzol reagent (Invitrogen) as per the manufacturer's instructions. The succeeding protocol followed was as mentioned in the Materials and Methods section. The cDNA was diluted 1 : 10 and fractionated on an agarose gel (1). Expression levels of *rrlC*, *cspC* and *acrB* were analysed.

**qRT-PCR experiments for mRNA stability:** RNA extraction and rifampicin addition was performed as mentioned in Materials and Methods section. qRT-PCR was then performed as a read-out for the relative abundance of the target gene transcripts. WT cells grown in LB, without any rifampicin treatment, and collected at 0 mins in accordance with other experimental sets, was normalised to 1 and all other transcript estimates was accordingly calculated.

**Electrophoretic Mobility Shift Assays (EMSA).** Electrophoretic mobility shift assays were conducted as previously described (2). Reaction mixtures contained 40 mM Tris-HCl (pH 8.6), 100mM NaCl, 12% glycerol, 4mM EDTA, 1nM <sup>32</sup>P-labeled substrate ssDNA, and 0.2, 1.6, 3, 10  $\mu$ M of StCspE and StCspE<sup>F30V</sup>. Reaction mixtures were incubated at 37 °C for 20 min and reactions terminated by the addition of a loading dye [0.1% (w/ v) bromophenol blue and xylene cyanol in 20% glycerol]. Samples were resolved on a 10% native PAGE in a 0.5 $\times$  TAE buffer at 80 V and 4 °C. Gels were dried, and the bands were visualized using a Fuji FLA-9000 phosphorimager. The band intensities were quantified in a UVItech gel documentation system using UVI-Band Map software (version 97.04) and plotted using GraphPad Prism (version 5.0).

## Supplementary Tables

**Table S1 :: List of strains and plasmids**

| Strain                                     | Genotype/features                                           | Source or Reference |
|--------------------------------------------|-------------------------------------------------------------|---------------------|
| <i>S. Typhimurium</i> 14028s (WT)          | Wild-type, parent of all <i>Salmonella</i> strains          | (3)                 |
| $\Delta cspE$                              | 14028s; <i>cspE</i> :: FRT                                  | This study          |
| $\Delta yciF$                              | 14028s; <i>yciF</i> :: FRT                                  | This study          |
| $\Delta cspE\Delta yciF$                   | 14028s; <i>cspE</i> :: FRT , <i>yciF</i> :: FRT             | This study          |
| $\Delta cspC$                              | 14028s; <i>cspC</i> :: FRT                                  | This study          |
| WT/VA                                      | 14028s; pTrc99A; Ap <sup>r</sup>                            | This study          |
| $\Delta cspE$ /VA                          | $\Delta cspE$ ; pTrc99A; Ap <sup>r</sup>                    | This study          |
| WT/pcspE                                   | 14028s; pcspE; Ap <sup>r</sup>                              | This study          |
| $\Delta cspE$ /pcspE                       | $\Delta cspE$ ; pcspE; Ap <sup>r</sup>                      | This study          |
| WT/pyciF                                   | 14028s; pyciF; Ap <sup>r</sup>                              | This study          |
| $\Delta cspE$ /pyciF                       | $\Delta cspE$ ; pyciF; Ap <sup>r</sup>                      | This study          |
| WT/pcspA                                   | 14028s; pcspA; Ap <sup>r</sup>                              | This study          |
| $\Delta cspE$ /pcspA                       | $\Delta cspE$ ; pcspA; Ap <sup>r</sup>                      | This study          |
| WT/pcspE-F30V                              | 14028s; pcspE-F30V; Ap <sup>r</sup>                         | This study          |
| $\Delta cspE$ /pcspE-F30V                  | $\Delta cspE$ ; pcspE-F30V; Ap <sup>r</sup>                 | This study          |
| WT/pcspC <sup>++</sup> -SL1344             | 14028s; pcspC <sup>++</sup> -SL1344; Ap <sup>r</sup>        | This study          |
| $\Delta cspE$ /pcspC <sup>++</sup> -SL1344 | $\Delta cspE$ ;pcspC <sup>++</sup> -SL1344; Ap <sup>r</sup> | This study          |
| <i>S. Typhimurium</i> SL1344 (WT)          | Wild-type, parent of all deletion strains in SL1344         | (4)                 |
| $\Delta cspE$                              | SL1344; <i>cspE</i> ::FRT                                   | This study          |
| $\Delta cspC$                              | SL1344; <i>cspC</i> ::FRT                                   | This study          |
| $\Delta cspE\Delta cspC$                   | SL1344; <i>cspE</i> :: FRT , <i>cspC</i> :: FRT             | This study          |
| $\Delta cspE\Delta cspC$                   | SL1344; <i>cspE</i> :: FRT , <i>cspC</i> :: FRT             | This study          |

| <b>Plasmids</b> | <b>Genotype/features</b>                                                                                                                          | <b>Source or Reference</b> |
|-----------------|---------------------------------------------------------------------------------------------------------------------------------------------------|----------------------------|
| pKD46           | Temperature sensitive $\lambda$ -Red recombinase expression plasmid; Ap <sup>r</sup>                                                              | (5)                        |
| pKD4            | Kanamycin resistance ( <i>kan</i> )                                                                                                               | (5)                        |
| pCP20           | Temperature sensitive FLP recombinase expression plasmid; Ap <sup>r</sup>                                                                         | (6)                        |
| pRS424          | Ampicillin resistance (Ap <sup>r</sup> )                                                                                                          | (7)                        |
| pTrc99A         | Ampicillin resistance (Ap <sup>r</sup> )                                                                                                          | (6)                        |
| pcspE           | pRS424 derivative with promoter and <i>cspE</i> cloned between <i>SpeI</i> and <i>XhoI</i> sites                                                  | This study                 |
| pcspE-F30V      | pRS424 derivative with promoter and F30V mutant of <i>cspE</i> cloned between <i>SpeI</i> and <i>XhoI</i> sites                                   | This study                 |
| pyciF           | pTrc99A derivative with <i>yciF</i> cloned between <i>BamHI</i> and <i>EcoRI</i> sites                                                            | This study                 |
| pcspA           | pTrc99A derivative with <i>cspA</i> cloned between <i>BamHI</i> and <i>EcoRI</i> sites                                                            | This study                 |
| pcspC++-SL1344  | pRS424 derivative with <i>cspC</i> operon with native promoter from <i>S. Typhimurium</i> SL1344 cloned between <i>SpeI</i> and <i>XhoI</i> sites | This study                 |

**Table S2 :: List of primers used for gene deletion and confirmation**

| <b>PrimerName</b>                                | <b>OligonucleotideSequence 5'-3'</b>                               |
|--------------------------------------------------|--------------------------------------------------------------------|
| <b><i>cspE</i> deletion primers</b>              |                                                                    |
| cspE-KO-FP                                       | CACAGCATTGTGTCTATTTTTCATGTAAAGGTAATTTGGTGTAGGCTGGAGCTGCTTC         |
| cspE-KO-RP                                       | CGAAAGGGCGGGTTTTGAAATCTTGCTGTCTCGGACGTATGCGGTCCATATGAATATCCTCCTTAG |
| <b><i>yciF</i> deletion primers</b>              |                                                                    |
| yciF-KO-FP                                       | GGCTCGCAGTATTTTGCCAGGAGAATTAGATTTGTGTAGGCTGGAGCTGCTTCG             |
| yciF-KO-RP                                       | CGGAATCATGCAAGCTGATAATTAATAACATGGTCCATATGAATATCCTCC                |
| <b><i>cspC</i> deletion primers</b>              |                                                                    |
| cspC-KO-FP                                       | CACAGCATTGTGTCTATTTTTCATGTAAAGGTAATTTGGTGTAGGCTGGAGCTGCTTC         |
| cspC-KO-RP                                       | CGAAAGGGCGGGTTTTGAAATCTTGCTGTCTCGGACGTATGCGGTCCATATGAATATCCTCCTTAG |
| <b><i>cspE</i> deletion confirmation primers</b> |                                                                    |
| cspE-CON-FP                                      | GATGGGGAAGGGTATGCTTCAG                                             |
| cspE-CON-RP                                      | GCGCTGCTGAATGTGCTG                                                 |
| <b><i>yciF</i> deletion confirmation primers</b> |                                                                    |
| yciF-CON-FP                                      | CCGCAACGAGCTTCTGAAGCCGG                                            |
| yciF-CON-RP                                      | CGGCTGGCCATAGATTCAAGCATCG                                          |

**Table S3 :: Primers used for cloning *cspE*, *yciF* and *cspA***

| <b>Primer name</b>                       | <b>Oligonucleotide sequence 5'- 3'</b>                                                         |
|------------------------------------------|------------------------------------------------------------------------------------------------|
| p- <i>cspE</i> -pRS-FP                   | GGACTAGTTGGGGAAGGGTATGCTTCAGTTGTG                                                              |
| <i>cspE</i> -pRS-RP                      | CGCCTCGAGTCACTTGTTCATCGTCATCCTTGTAATCCAGAGCAGTTACGTTTGCAGC<br>GG                               |
| <i>yciF</i> -pTrc-FP                     | CCGGAATTCATGAATATCAAAAACCGTTGAAGACC                                                            |
| <i>yciF</i> -pTrc-RP                     | CGCGGATCCTCACTTGTTCATCGTCATCCTTGTAATCCTTGTTCATCGTCATCCTTGTA<br>TCTTTCGATTTGCGTTCAGCACTTTTATTAA |
| <i>cspA</i> -pTrc-FP                     | CCGGAATTCATGTCCGGTAAAATGACTGGTATCG                                                             |
| <i>cspA</i> -pTrc-RP                     | CGCGGATCCTCACTTGTTCATCGTCATCCTTGTAATCCAGGCTGGTTACGTTGCCAGC<br>TGC                              |
| p- <i>yobF</i> - <i>cspC</i> -<br>pRS-FP | GGACTAGTATGCTTACCGGGGCGCAAATGGC                                                                |
| <i>cspC</i> -pRS-RP                      | CGCCTCGAGTCACTTGTTCATCGTCATCCTTGTAATCCATCCAGAGACATTTGAAG                                       |

**Table S4 :: Primers used for qRT-PCR**

| Primer Name | Oligonucleotide sequence 5'- 3' |
|-------------|---------------------------------|
| rrlC-FP     | GAGCGTTCTGTAAGCCTGTG            |
| rrlC-RP     | CGCAGTAACACCAAGTACGG            |
| cspA-FP     | AACGCTGATAAAGGCTTCGG            |
| cspA-RP     | TTACAGGCTGGTTACGTTGC            |
| cspB-FP     | GGGCTTTGGTTTCATTACGC            |
| cspB-RP     | TTGACCGCTGATGGACCTTT            |
| cspC-FP     | ATCCAAAGGTTTTGGCTTCA            |
| cspC-RP     | GTTAACAGCAGCCGGACCT             |
| cspE-FP     | GGATTCGGTTTCATTACTCCGG          |
| cspE-RP     | CGTTTGCAGCGGAAGGGCC             |
| pagC-FP     | TCTGTTGAGCCTGAAGGTATTC          |
| pagC-RP     | CGACGTTGAAGCCGTTTATTT           |
| yciF-FP     | CTTGAAGAAACCCAGGGTCA            |
| yciF-RP     | CGCGTACTTCGTTTTTCTCC            |
| acrA-FP     | CTTCCGGGTCGTACCGTTGC            |
| acrA-RP     | CGTGCGCGAACGAACATTCC            |
| acrB-FP     | AAGTGCTGGATGAGGTCACG            |
| acrB-RP     | ACTCGAAGTCAAAGCCGGTT            |
| tolC-FP     | AACCGTAACCTGTCGCTGTT            |
| tolC-RP     | TGCGAGTTAACCATCCCACC            |
| ompF-FP     | GTGGACGGTCTCTCTTTCGG            |
| ompF-RP     | TCAGCATATACGGCAGCCAG            |
| ompC-FP     | GGTGGATGGTCTGGACTTCG            |
| ompC-RP     | TCTGAGAATACTGCGCTGCC            |
| ompD-FP     | TCGCGAATAAAACCCAGAAC            |
| ompD-RP     | CTTTAGCCGCTTTGGTGAAG            |
| hfq-FP      | CGGTCAGCCAGATGGTTTAT            |
| hfq-RP      | TCAGTCTCTTCGCTGTCCTG            |
| uspA-FP     | GTCTACCAACGCTGGCTACC            |
| uspA-RP     | GGCACAATCAGCATGTCAAC            |
| rne-FP      | CTTCCTTAACGCGCTGAAAC            |
| rne-RP      | GCGACGGTTACGACGATTAT            |
| rpoE-FP     | TGCGCTACCAGCATAAAGTG            |
| rpoE-RP     | GCCGCTTTCAAAGTTTTCTG            |

|           |                        |
|-----------|------------------------|
| degP-FP   | CTGGCTCTGAGTTTAGGTTTGG |
| degP-RP   | GTATTCACCGTGGTGCTACCTT |
| PNPase-FP | GATGGCCGTGAAAAAGACAT   |
| PNPase-RP | ACGGAGTACGGAGGGAAGTT   |
| rybB-FP   | GCCACTGCTTTTCTTTGATG   |
| rybB-RP   | AAACCCACCAACCTTGAACC   |

## Supplementary References

1. Bhaskarla, C., Das, M., Verma, T., Kumar, A., Mahadevan, S., and Nandi, D. (2016) Roles of Lon protease and its substrate MarA during sodium salicylate-mediated growth reduction and antibiotic resistance in *Escherichia coli*. *Microbiology***162**, 764-776
2. Thakur, M., Kumar, M. B., and Muniyappa, K. (2016) *Mycobacterium tuberculosis* UvrB Is a Robust DNA-Stimulated ATPase That Also Possesses Structure-Specific ATP-Dependent DNA Helicase Activity. *Biochemistry***55**, 5865-5883
3. Allam, U. S., Krishna, M. G., Lahiri, A., Joy, O., and Chakravorty, D. (2011) *Salmonella enterica* serovar Typhimurium lacking hfq gene confers protective immunity against murine typhoid. *PloS one***6**, e16667
4. Shivcharan, S., Yadav, J., and Qadri, A. (2018) Host lipid sensing promotes invasion of cells with pathogenic *Salmonella*. *Sci Rep***8**, 15501
5. Datsenko, K. A., and Wanner, B. L. (2000) One-step inactivation of chromosomal genes in *Escherichia coli* K-12 using PCR products. *Proc Natl Acad Sci U S A***97**, 6640-6645
6. Eswarappa, S. M., Karnam, G., Nagarajan, A. G., Chakraborty, S., and Chakravorty, D. (2009) lac repressor is an antivirulence factor of *Salmonella enterica*: its role in the evolution of virulence in *Salmonella*. *PloS one***4**, e5789
7. Saha, P. P., Srivastava, S., Kumar, S. K. P., Sinha, D., and D'Silva, P. (2015) Mapping Key Residues of ISD11 Critical for NFS1-ISD11 Subcomplex Stability: IMPLICATIONS IN THE DEVELOPMENT OF MITOCHONDRIAL DISORDER, COXPD19. *J Biol Chem***290**, 25876-25890



## SUPPLEMENTARY FIGURES

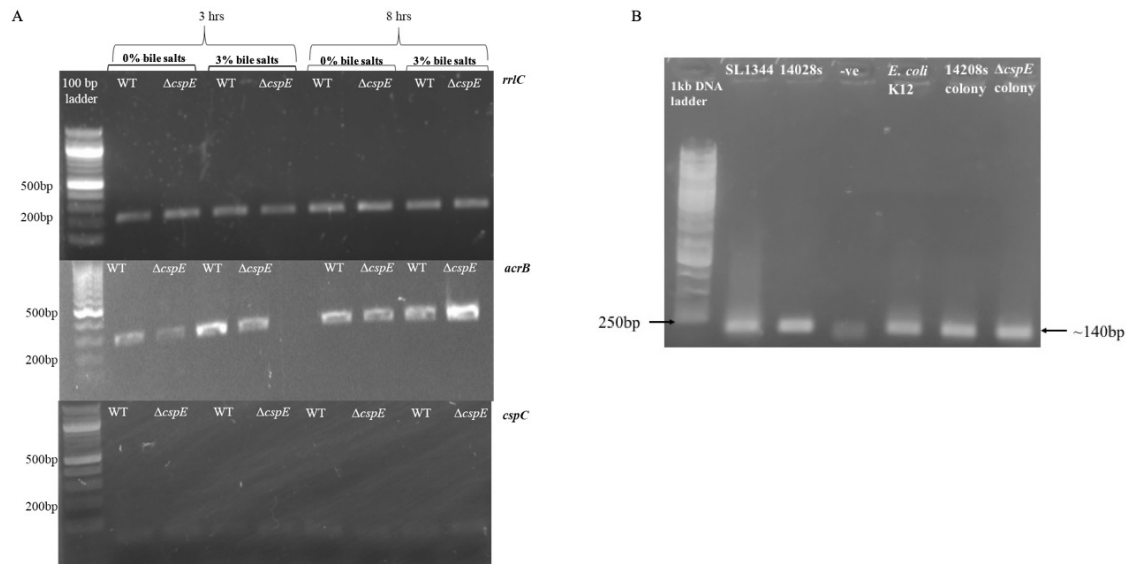

**Fig S1. No detectable *cspC* transcript is observed in *S. Typhimurium* 14028s with or without bile salts treatment.**

(A) Semi quantitative Reverse Transcriptase PCR was performed using *cspC* internal primers. *rrlC* internal primers was using as the loading control and *acrB* was used as the positive control. (B) Genomic DNA amplification of *cspC* using the internal primers for *cspC*.

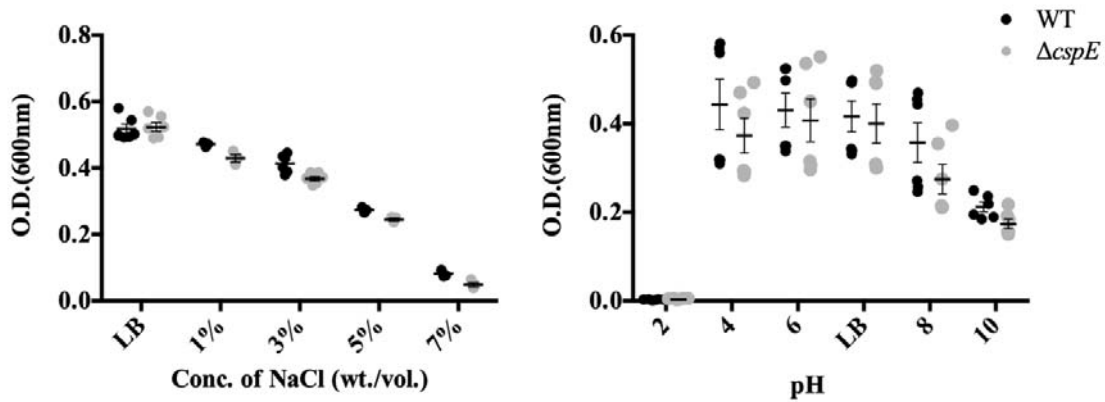

**Fig S2. WT and  $\Delta cspE$  doesn't show any growth difference in varying salt (NaCl) concentrations or pH.**

(A) Effect of increasing concentrations of NaCl, (B) pH on WT and  $\Delta cspE$  in LB.  $5 \times 10^6$  CFU/ml of WT and  $\Delta cspE$  was used to inoculate the respective media conditions and grown at  $37^\circ\text{C}$ . O.D. (600nm) was acquired at the 8<sup>th</sup>hr of growth, in a 96-well polystyrene microtitre plate. Data is presented as mean  $\pm$  SEM and is representative of three independent experiments. \*  $p < 0.05$ ; \*\*  $p < 0.01$ ; \*\*\*  $p < 0.001$ , \*\*\*\*  $p < 0.0001$ .

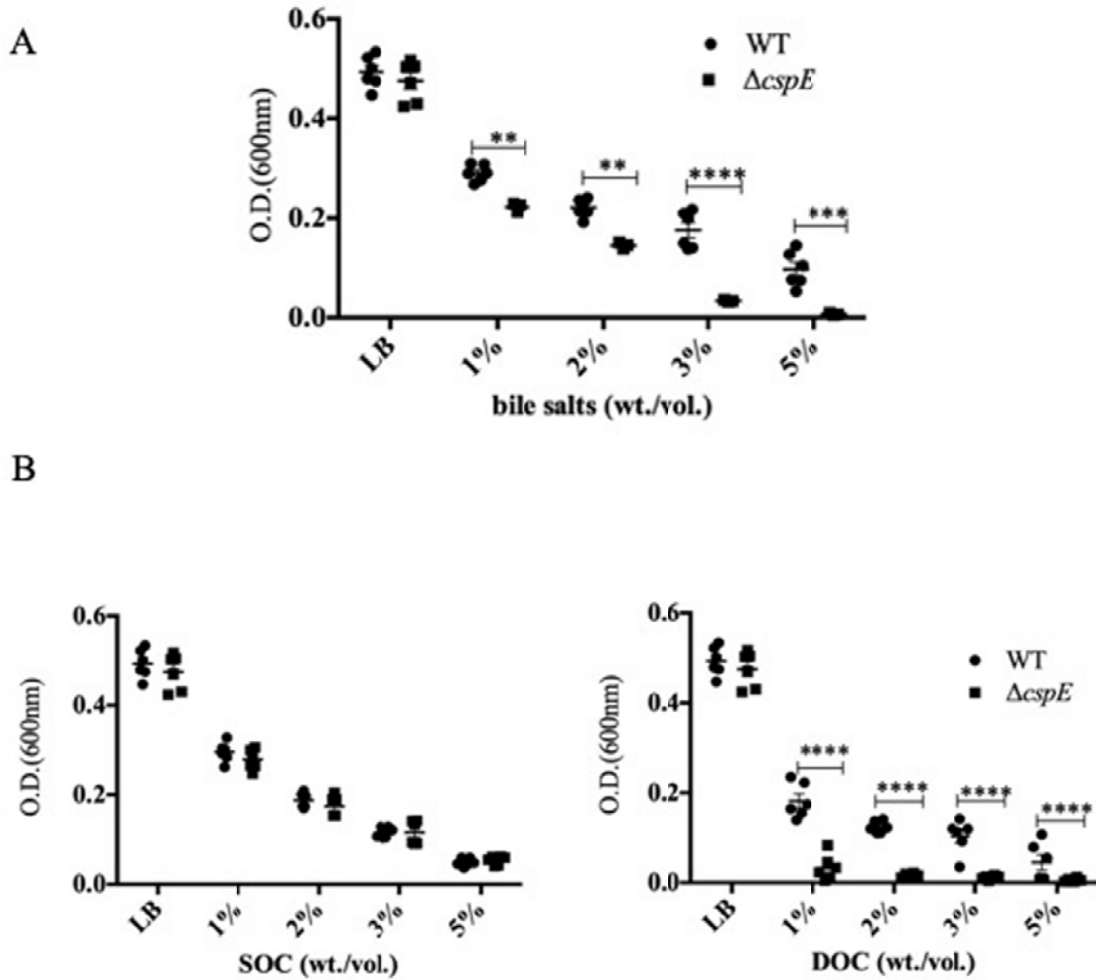

**Fig S3. *S. Typhimurium*  $\Delta cspE$  shows a dose dependant sensitivity to increasing concentrations of bile salts, specifically to deoxycholate.**

(A) The effect of increasing concentrations of bile salts on WT and  $\Delta cspE$  in LB media. (B) The effect of varying doses of the bile salts components on the growth of WT 14028s and  $\Delta cspE$  namely, Sodium Cholate (SOC), Sodium Deoxycholate (DOC) was studied at the 8<sup>th</sup> hour time-point. Data is presented as mean $\pm$ SEM and is representative of three independent experiments. \*  $p < 0.05$ ; \*\*  $p < 0.01$ ; \*\*\*  $p < 0.001$ ; \*\*\*\*  $p < 0.0001$ .

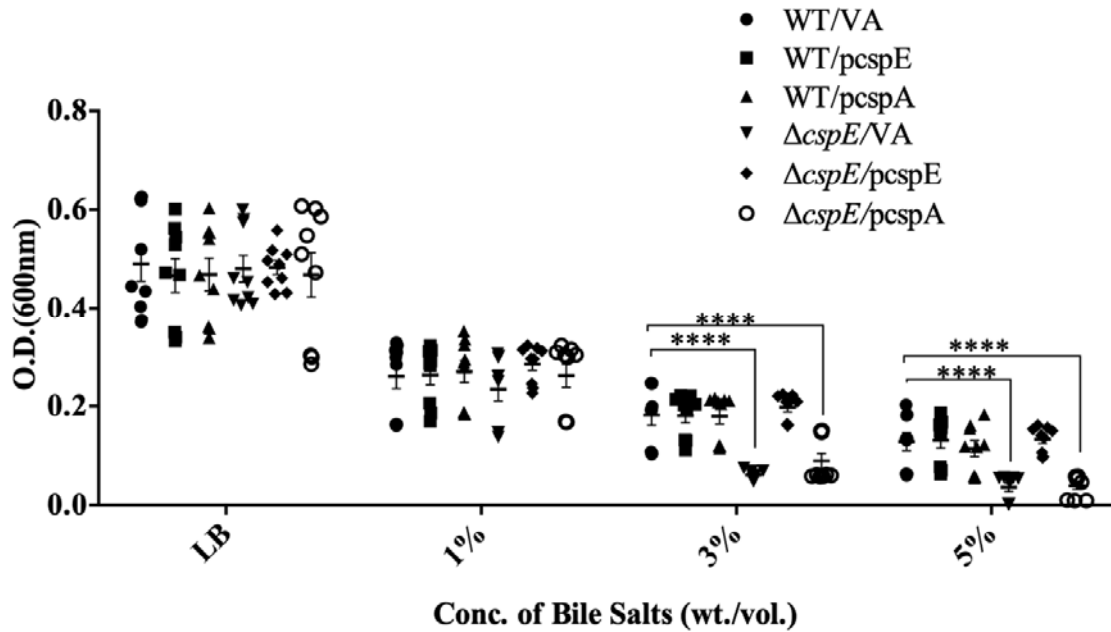

**Fig S4. Bile sensitivity of *S. Typhimurium*  $\Delta cspE$  is rescued by complementation of *cspE* but not *cspA*.**

The effect of increasing concentrations of bile salts on WT/VA,  $\Delta cspE/VA$ , *cspE* complemented (WT/pcspE and  $\Delta cspE/pcspE$ ) and *cspA* complemented strains (WT/pcspA and  $\Delta cspE/pcspA$ ) in LB media was studied at the 8<sup>th</sup> hour time-point. Data is presented as mean $\pm$ SEM and is representative of three independent experiments. \* p<0.05; \*\* p<0.01; \*\*\* p<0.001; \*\*\*\* p<0.0001.

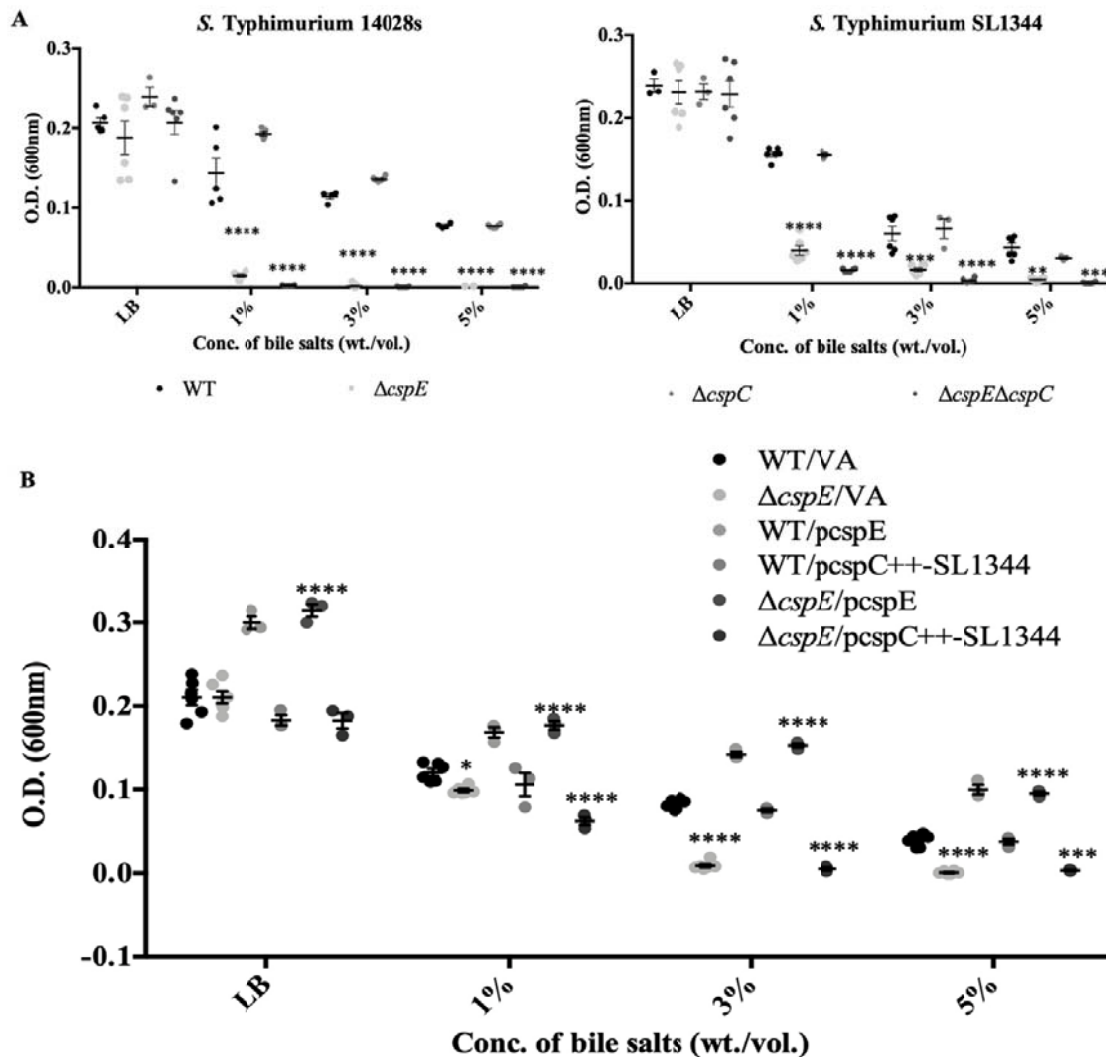

**Fig S5. *S. Typhimurium* 14028s encoded *cspC* does not play a major role in bile resistance.**

(A) The effect of increasing concentrations of bile salts on *wild type* and genetic deletion strains of *S. Typhimurium* 14028s and SL1344. The strains used were WT,  $\Delta cspE$ ,  $\Delta cspC$  and  $\Delta cspE\Delta cspC$ . (B) The effect of increasing concentrations of bile salts on WT/VA,  $\Delta cspE/VA$ , *cspE* complemented from 14028s (WT/pcspE and  $\Delta cspE/pcspE$ ), *cspC* complemented with the entire operon of *cspC* from SL1344 (WT/pcspC++-SL1344 and  $\Delta cspE/pcspC++-SL1344$ ) in LB media was studied at the 8<sup>th</sup> hour time-point. Data is presented as mean±SEM and is representative of three independent experiments. \*  $p < 0.05$ ; \*\*  $p < 0.01$ ; \*\*\*  $p < 0.001$ ; \*\*\*\*  $p < 0.0001$ .

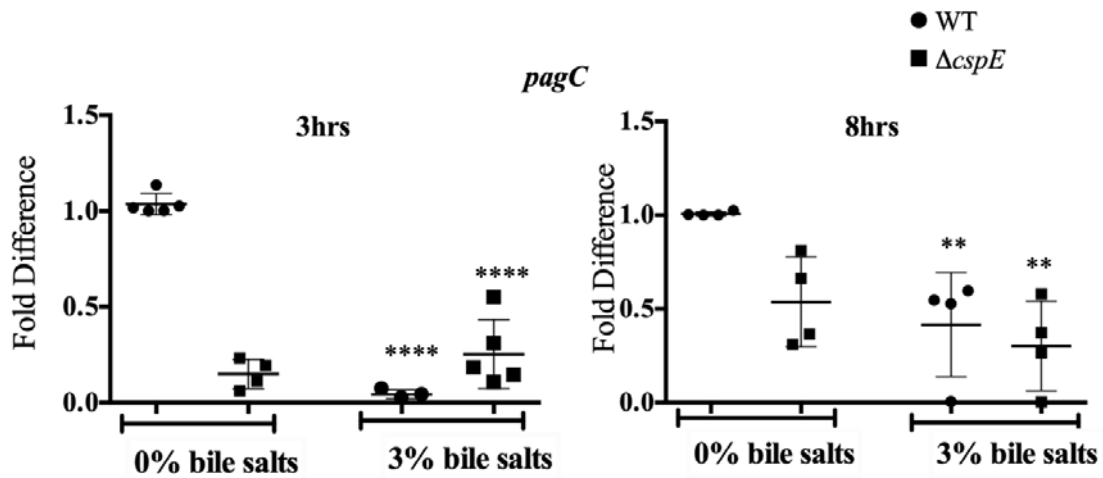

**Fig S6. *pagC* is down-regulated in both WT and  $\Delta cspE$ , upon bile salts treatment.**

The transcript levels of *pagC* was determined using qRT-PCR for the WT and  $\Delta cspE$  strains, in the absence (0%) and presence (3%) of bile salts, at the 3<sup>rd</sup> and 8<sup>th</sup> hour of growth. In all panels, values are normalized by those obtained for the WT strain grown in 0% bile salts, at the indicated time point. Data is presented as mean $\pm$ SEM and is representative of three independent experiments. \*  $p < 0.05$ ; \*\*  $p < 0.01$ ; \*\*\*  $p < 0.001$ ; \*\*\*\*  $p < 0.0001$ .

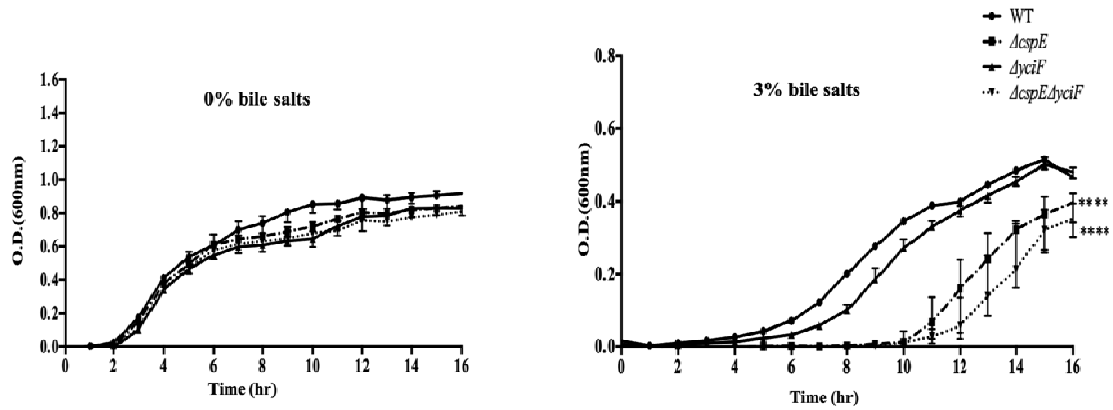

**Fig S7. Deletion of *yciF* does not have any effect on the bile resistance of *S. Typhimurium* 14028s.**

Kinetic growth analysis in terms of O.D. (600nm) of WT,  $\Delta cspE$ ,  $\Delta yciF$  and  $\Delta cspE\Delta yciF$  strains in the absence (0%) and presence (3%) of bile salts. Data is presented as mean $\pm$ SEM and representative of three independent experiments. \*  $p < 0.05$ ; \*\*  $p < 0.01$ ; \*\*\*  $p < 0.001$ ; \*\*\*\*  $p < 0.0001$ .

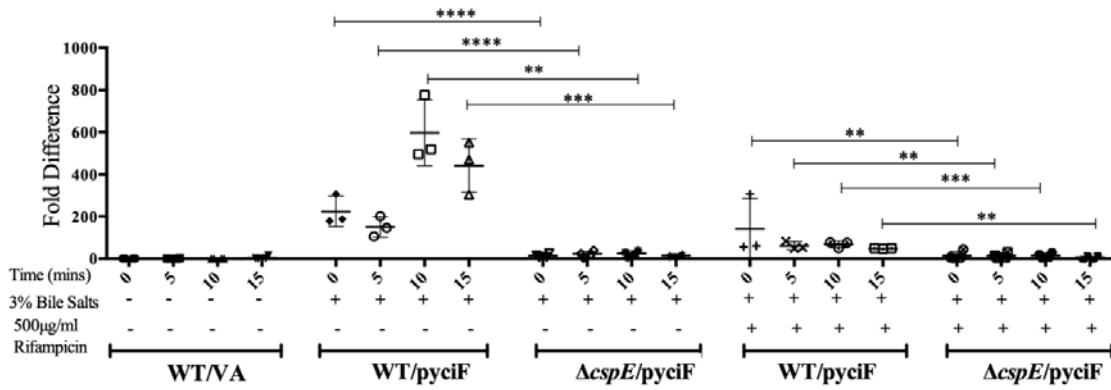

**Fig S8. Quantitation of mRNA transcripts by qRT-PCR confirms the mRNA stabilisation property of CspE.**

The *yciF* mRNA stability was determined in terms of the relative amounts of its transcript levels, by qRT-PCR, in the *yciF* over-expressing strains (WT/*pyciF* and  $\Delta$ *cspE/pyciF*), using 500µg/ml Rifampicin, added at the end of the 8<sup>th</sup> of growth. mRNA levels in the untreated WT/VA collected at 0 mins, was normalised to 1. All other samples were calculated as fold-change to this reference value. Data is presented as mean±SEM and is representative of three independent experiments. \*  $p < 0.05$ ; \*\*  $p < 0.01$ ; \*\*\*  $p < 0.001$ ; \*\*\*\*  $p < 0.0001$ .



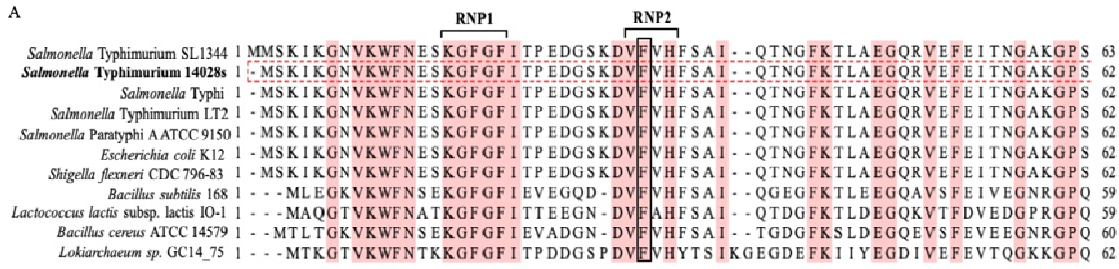

**B**

**CspE-F30A**

| Predicted pseudo $\Delta\Delta G$ :<br>-0.6 (Reduced stability) | Environment               | Wild type | Mutant |
|-----------------------------------------------------------------|---------------------------|-----------|--------|
| Mutation:                                                       | Secondary structure       | E         | E      |
| PDB name: 3I2Z.pdb                                              | Solvent accessibility (%) | 42.8      | 47.6   |
| Chain: A                                                        | DEPTH (Å)                 | 3.6       | 3.4    |
| Wild-type: PHE                                                  | OSP                       | 0.36      | 0.38   |
| Position: 30                                                    | HBOND_SS                  | False     | False  |
| Mutant-type: ALA                                                | HBOND_SN                  | False     | False  |
|                                                                 | HBOND_SO                  | False     | False  |

  

**CspE-F30V**

| Predicted pseudo $\Delta\Delta G$ :<br>1.03 (Increased stability) | Environment               | Wild type | Mutant |
|-------------------------------------------------------------------|---------------------------|-----------|--------|
| Mutation:                                                         | Secondary structure       | E         | E      |
| PDB name: 3I2Z.pdb                                                | Solvent accessibility (%) | 42.8      | 43.1   |
| Chain: A                                                          | DEPTH (Å)                 | 3.6       | 3.4    |
| Wild-type: PHE                                                    | OSP                       | 0.36      | 0.38   |
| Position: 30                                                      | HBOND_SS                  | False     | False  |
| Mutant-type: VAL                                                  | HBOND_SN                  | False     | False  |
|                                                                   | HBOND_SO                  | False     | False  |

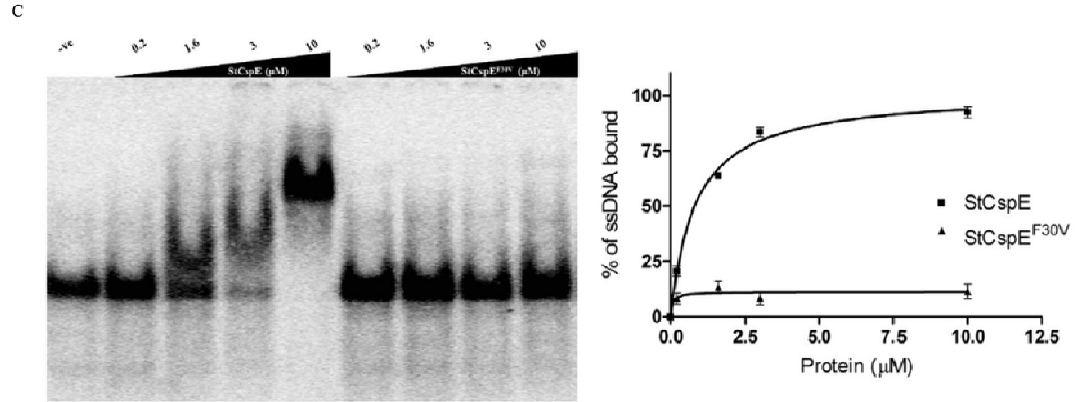

**Fig S9. F30 in RNP2 of CspE is essential for ssDNA binding function of CspE.**

(A) ClustalW was used to align the CspE sequences from several species within the eubacterial domain. Accession Nos for sequences in MSA: *S. Typhimurium* SL1344 (A0A0H3N9E2\_SALTS); *S. Typhimurium* 14028s (A0A0F6AYC2\_SALT1); *S. Typhi* (Q8XGU4\_SALTI); *S. Typhimurium* LT2 (Q7CQZ5\_SALTY); *S. Paratyphi A* ATCC 9150 (A0A0H2WQN8\_SALPA); *E. coli* K12 (CSPE\_ECOLI); *Shigella flexneri* CDC 796-8 (E7TCU3\_SHIFL); *Bacillus subtilis* 168 (P32081|CSPB\_BACSU); *Lactococcus lactis* subsp. lactis IO-1 (H5SWC0\_LACLL); *Bacillus cereus* ATCC 14579 (CSPE\_BACCR); *Lokiarchaeum sp.* GC14\_75 (A0A0F8VY40\_9ARCH). (B) The software Site Directed Mutator was used for the prediction of the F30V mutation, that indicates a stabilizing effect on the secondary structure (<http://marid.bioc.cam.ac.uk/sdm2/prediction>). (C) EMSA was performed with <sup>32</sup>P labeled substrate ssDNA at 1 nM in the absence or presence of 0.2, 1.6, 3 and 10 μM of StCspE and StCspE<sup>F30V</sup>. Binding of StCspE and StCspE<sup>F30V</sup> to nucleic acid substrate containing a single CCAT site. The filled triangle represents increasing concentrations of purified proteins. Graphical representation of complex formation by StCspE and StCspE<sup>F30V</sup>, as a function of protein concentration. Data is presented as mean±SEM and representative of three independent

experiments. The best fit curve was obtained by subjecting the data to non-linear regression analysis in GraphPad Prism (version 5), using the equation for one site specific binding with a Hill slope.

A

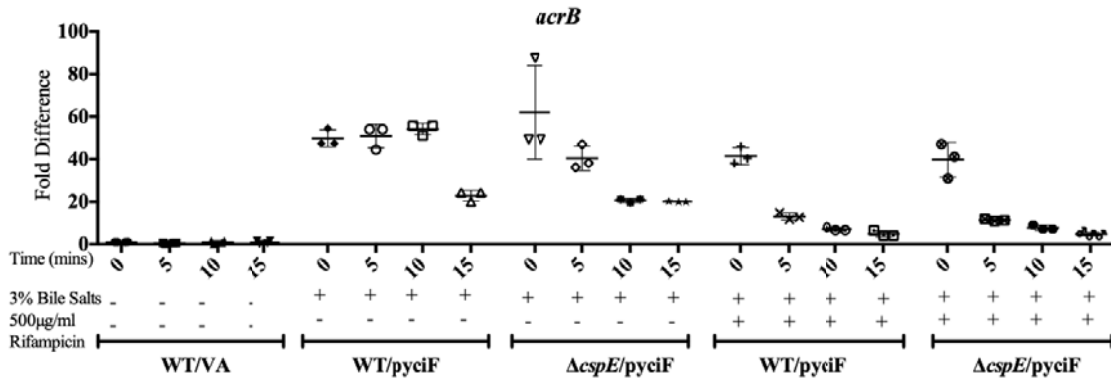

B

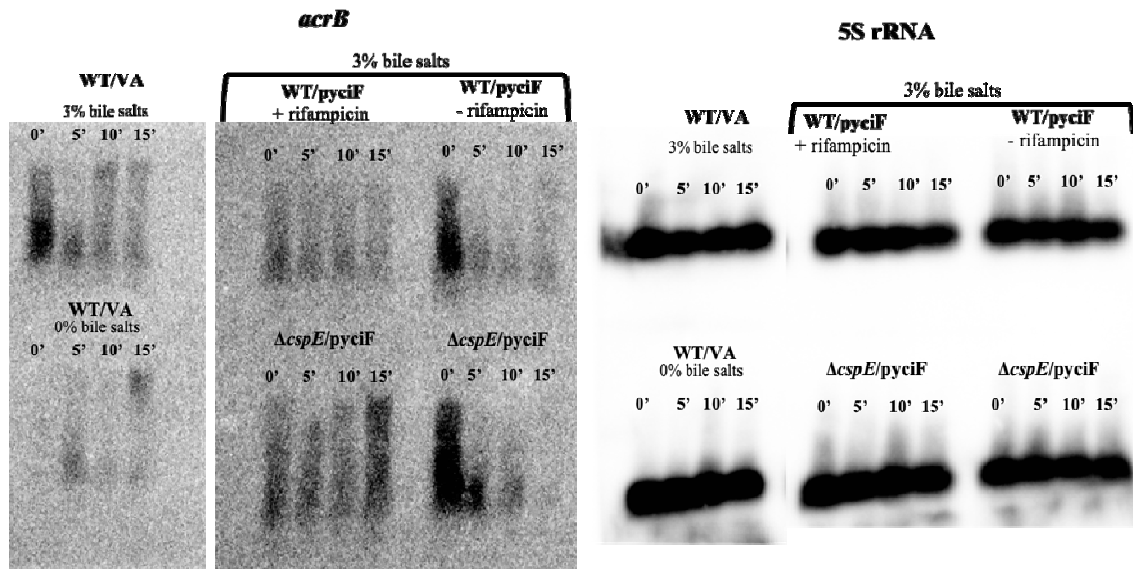

**Fig S10. *acrB* is induced by bile but is not regulated by CspE.**

(A) qRT-PCR quantitation of *acrB* mRNA. *rrlC* was used as the house-keeping normalization control. (B) The *acrB* mRNA stability was determined in terms of the relative amounts of its transcript levels. The relative mRNA levels of *acrB* were determined upon bile treatment in the presence or absence of rifampicin, in WT/*pyciF* and  $\Delta$ *cspE/pyciF*. 5S rRNA was used as the loading control.

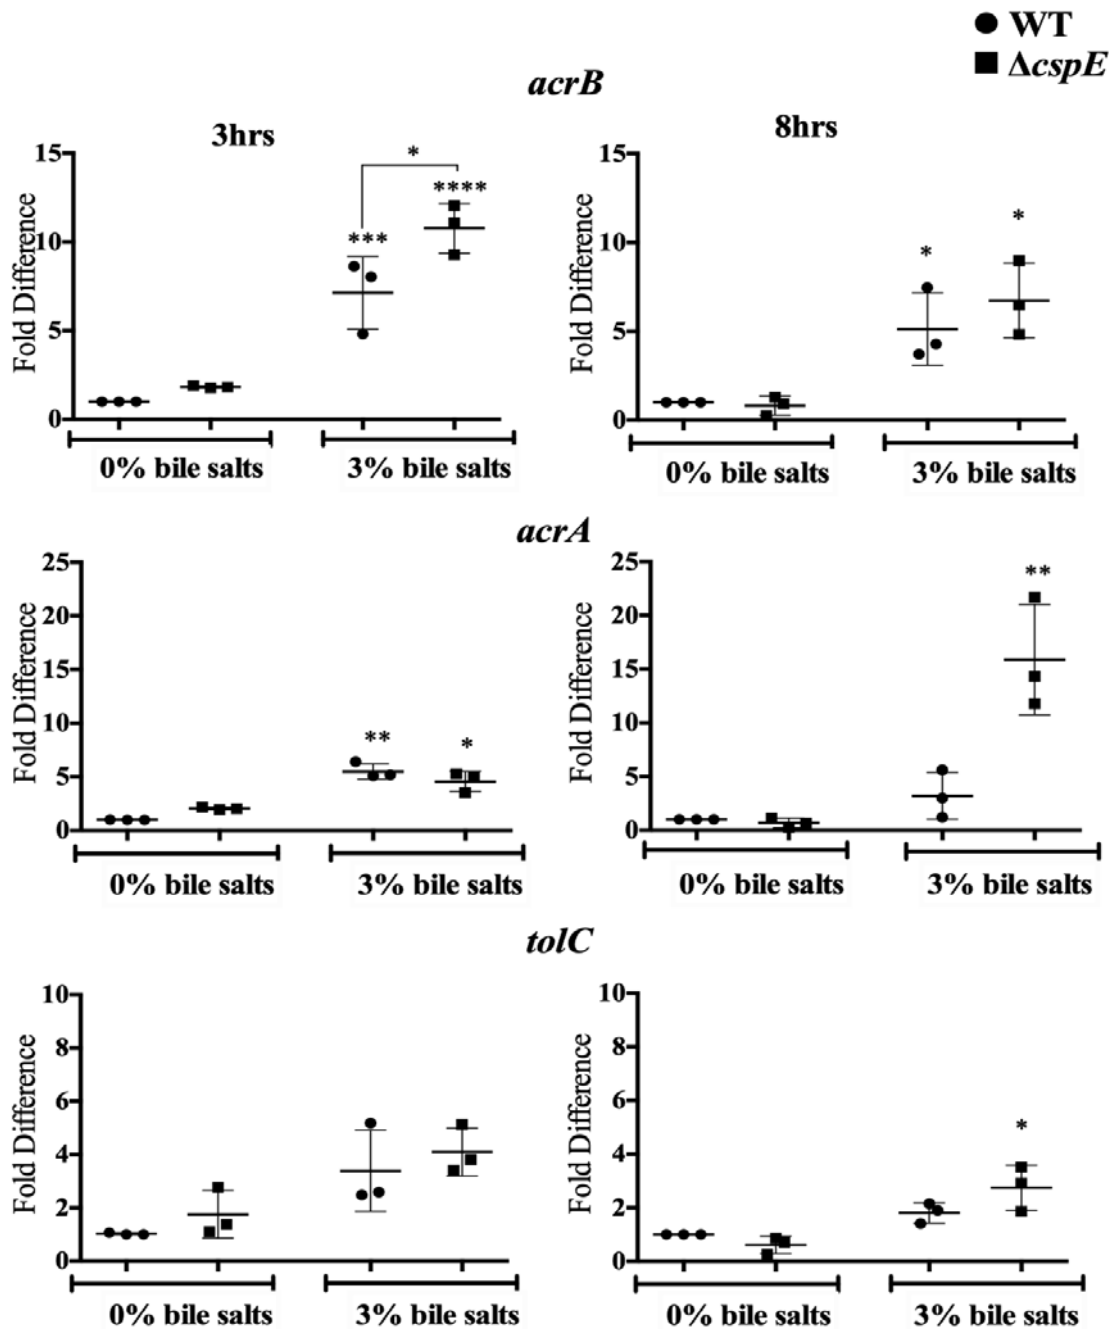

Fig S11. The major efflux pump AcrAB-TolC components do not show any differential expression between bile salts-treated WT and  $\Delta cspE$ .

Transcript levels of *acrB*, *acrA* and *tolC* were using qRT-PCR for the WT and  $\Delta cspE$  strains in the absence (0%) or presence (3%) of bile salts, at the 3<sup>rd</sup> and 8<sup>th</sup> hour of growth. In all panels, values are normalized by those obtained for the WT strain grown in 0% bile salts, at the indicated time point. Data is presented as mean±SEM and representative of three independent experiments. \* p<0.05; \*\* p<0.01; \*\*\* p<0.001; \*\*\*\* p<0.0001.

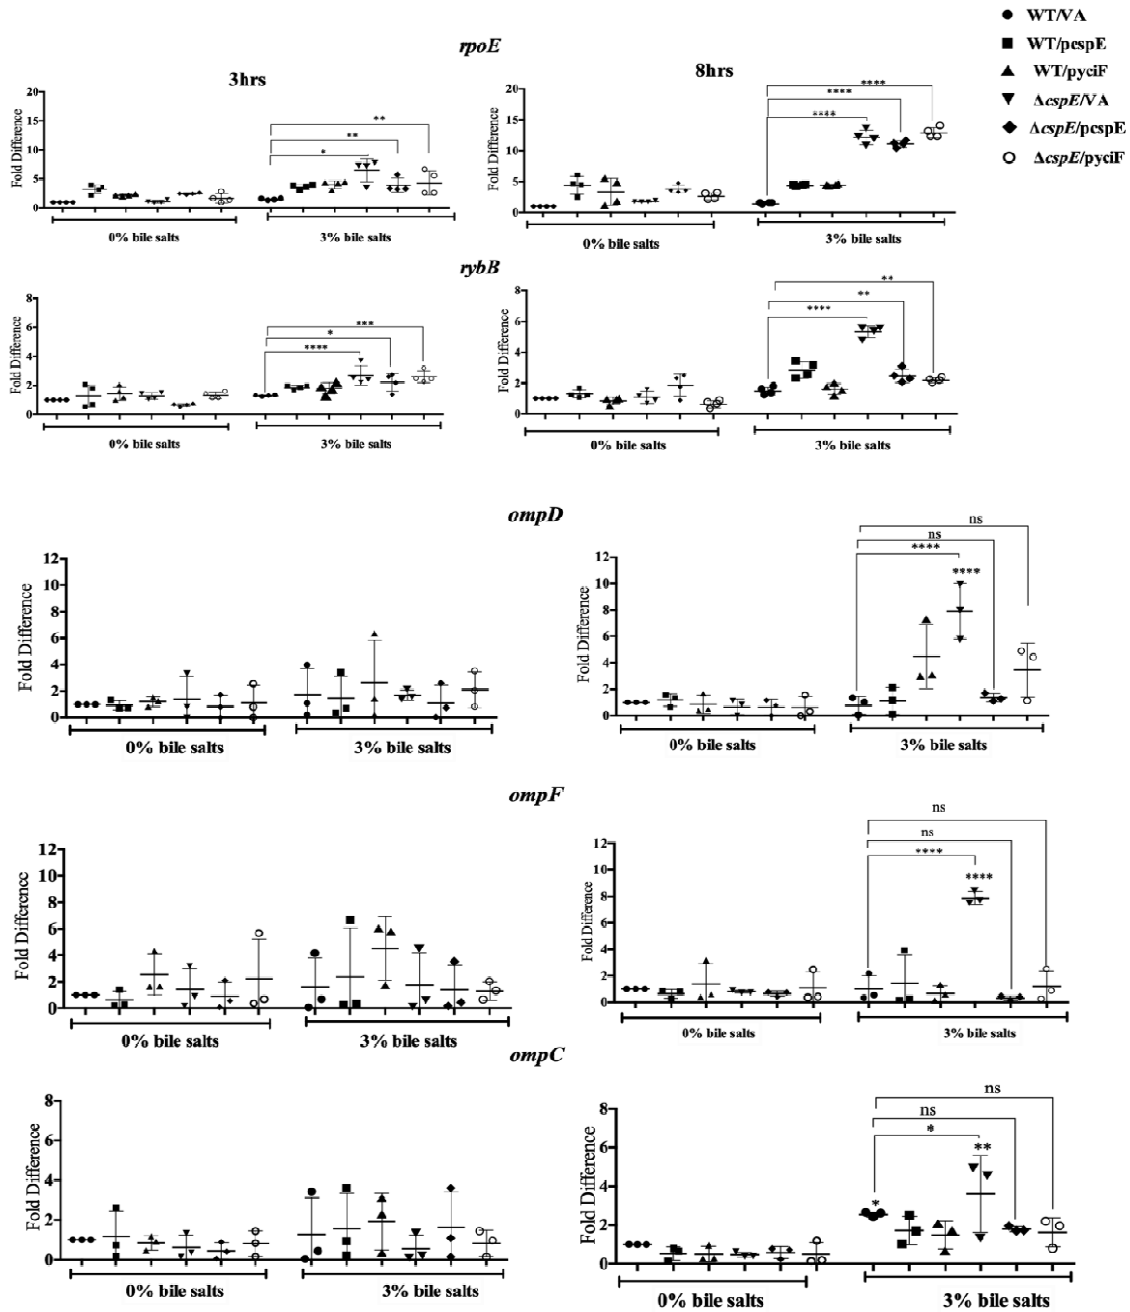

**Fig S12. Complementation of *cspE* and over-expression of *yicF* rescues perturbed transcript levels of ESR components and porins, in bile salts-treated  $\Delta cspE$ .**

Transcript levels of *rpoE*, *rybB* and OMPs (*ompD*, *ompF*, *ompC*) were determined using qRT-PCR for the WT/VA,  $\Delta cspE$ /VA, *cspE* complemented strains (WT/pcspE and  $\Delta cspE$ /pcspE), and *yicF* over-expression (WT/pyciF and  $\Delta cspE$ /pyciF) strains, with (3%) or without (0%) pre-treatment of bile salts, at the 3<sup>rd</sup> and 8<sup>th</sup> hour of growth. In all panels, values are normalized by those obtained for the WT strain grown in 0% bile salts, at the indicated time point. Data is presented as mean $\pm$ SEM and representative of three independent experiments. \* p<0.05; \*\* p<0.01; \*\*\* p<0.001; \*\*\*\* p<0.0001.

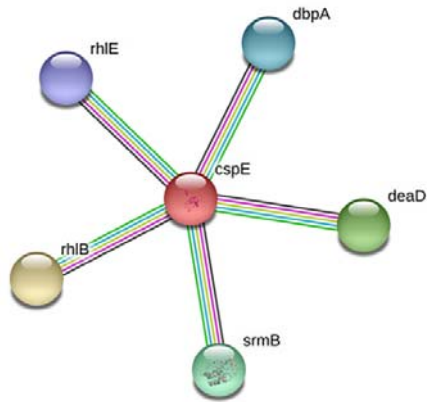

| node | annotation                                                                                                                                                                                                                                                                                                                                                                        |
|------|-----------------------------------------------------------------------------------------------------------------------------------------------------------------------------------------------------------------------------------------------------------------------------------------------------------------------------------------------------------------------------------|
| srmB | <ul style="list-style-type: none"> <li>ATP-dependent RNA helicase SrmB;</li> <li>DEAD-box RNA helicase involved in the assembly of the 50S ribosomal subunit at low temperature.</li> <li>Exhibits RNA-stimulated ATP hydrolysis and RNA unwinding activity</li> </ul>                                                                                                            |
| dbpA | <ul style="list-style-type: none"> <li>ATP-dependent RNA helicase DbpA;</li> <li>DEAD-box RNA helicase involved in the assembly of the 50S ribosomal subunit.</li> <li>Has an RNA-dependent ATPase activity, which is specific for 23S rRNA, and a 3' to 5' RNA helicase activity that uses the energy of ATP hydrolysis to destabilize and unwind short rRNA duplexes</li> </ul> |
| rhIE | <ul style="list-style-type: none"> <li>ATP-dependent RNA helicase RhlE;</li> <li>DEAD-box RNA helicase involved in ribosome assembly.</li> <li>Has RNA-dependent ATPase activity and unwinds double-stranded RNA</li> </ul>                                                                                                                                                       |
| rhIB | <ul style="list-style-type: none"> <li>ATP-dependent RNA helicase RhlB;</li> <li>DEAD-box RNA helicase involved in RNA degradation.</li> <li>Has RNA-dependent ATPase activity and unwinds double-stranded RNA</li> </ul>                                                                                                                                                         |
| deaD | <ul style="list-style-type: none"> <li>ATP-dependent RNA helicase DeaD;</li> <li>DEAD-box RNA helicase involved in various cellular processes at low temperature, including ribosome biogenesis, mRNA degradation and translation initiation</li> </ul>                                                                                                                           |

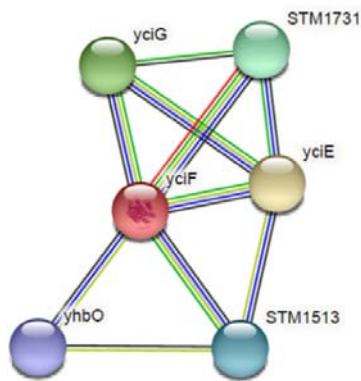

|         |                                          |
|---------|------------------------------------------|
| yciE    | <i>Cytoplasmic protein (168 aa)</i>      |
| yciG    | <i>Cytoplasmic protein (60 aa)</i>       |
| STM1731 | <i>Catalase (292 aa)</i>                 |
| STM1513 | <i>Hypothetical protein (60 aa)</i>      |
| yhbO    | <i>Intracellular proteinase (172 aa)</i> |

**Fig S13. Many RNA helicases and degradation related protein constitute the CspE interaction network.**

*S. Typhimurium* LT2 was used as the query organism to generate a protein-protein interaction network of CspE and YciF, using the available software STRING. Interactions were established using data available from KEGG Pathways, PFAM Protein Domains and INTERPRO Protein Domains and Features databases.
